# Supplementary material for: Lmo7 recruits myosin II heavy chain to regulate actomyosin contractility and apical domain size in Xenopus ectoderm
Source: Oxford University Press journal article supplement (doi:10.1242/dev.200236), 2022-04-22
Supplement: dev200236supp.pdf [file dev200236supp.pdf]

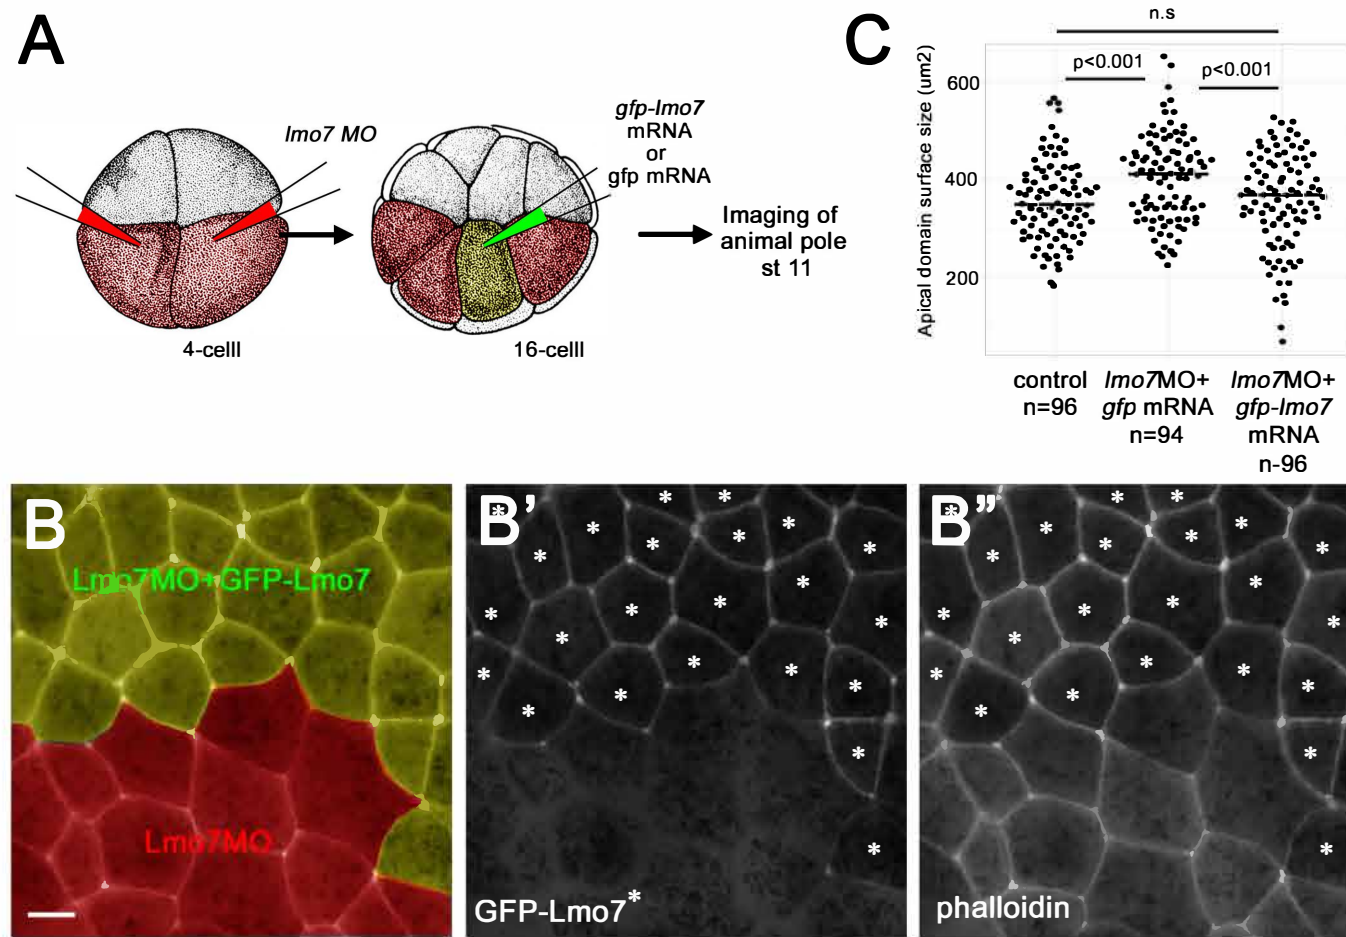

Figure S1

**Fig. S1. GFP-Lmo7 co-expression rescues increased apical domain expansion in *lmo7* morphants**

(A) Schematic diagram of the experimental design. *lmo7* ATG MO (30 ng) was injected into two ventral blastomeres of four-cell embryos (red). At 16-32 cell stage, RNA encoding control GFP (100 pg) or GFP-Lmo7 (100 pg) was injected into one of the ventral blastomeres (yellow). This sequential injection minimizes non-specific binding of morpholinos to RNA in the injection mixture. (B-B'') Representative image of the boundary between Lmo7MO cell clusters with Lmo7MO+GFP-Lmo7 cell clusters. Embryos were co-stained by phalloidin to outline the apical domain of individual cells. (C) Quantification of apical domain surface size. Control uninjected cells (n=96), *lmo7*-ATGMO+GFP cells (n=94) and *lmo7*-ATGMO+GFP-Lmo7 cells from more than five different embryos. Statistical significance of the difference between the median values was assessed by Dunn's test using a Bonferonni correction for the p-values. Scale bar: 10  $\mu$ m in B.

## Figure S2

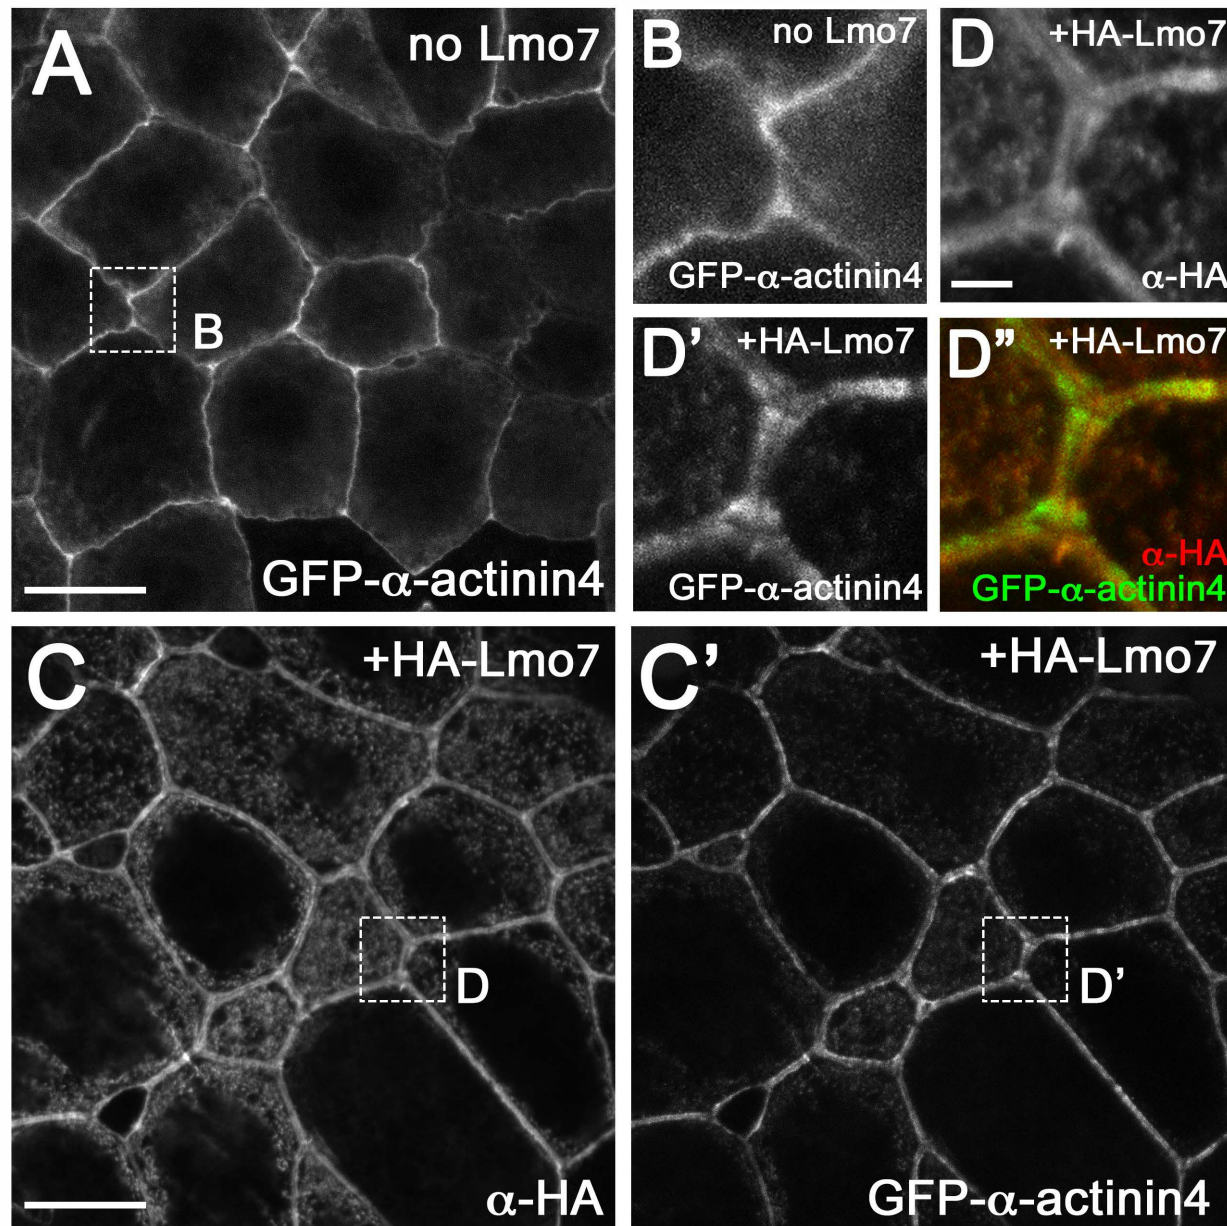

**Fig. S2. Lmo7 promotes  $\alpha$ -actinin enrichment in perijunctional actomyosin bundles** RNA encoding GFP- $\alpha$ -actinin 4 (200 pg) was injected into 4-8 cell stage embryos with or without RNA encoding HA-Lmo7 (500 pg). (A, B) GFP- $\alpha$ -actinin 4 localizes at apical junctions and forms a single band. An area marked by a rectangle in A is enlarged in B. (C-D'') HA-Lmo7 promotes GFP- $\alpha$ -actinin 4 association with apical junctions. Areas marked by rectangles in C-C' are enlarged in D-D''. GFP- $\alpha$ -actinin 4 forms thick double bands that largely overlap HA-Lmo7. Scale bars: 10  $\mu$ m in A and C. 2  $\mu$ m in

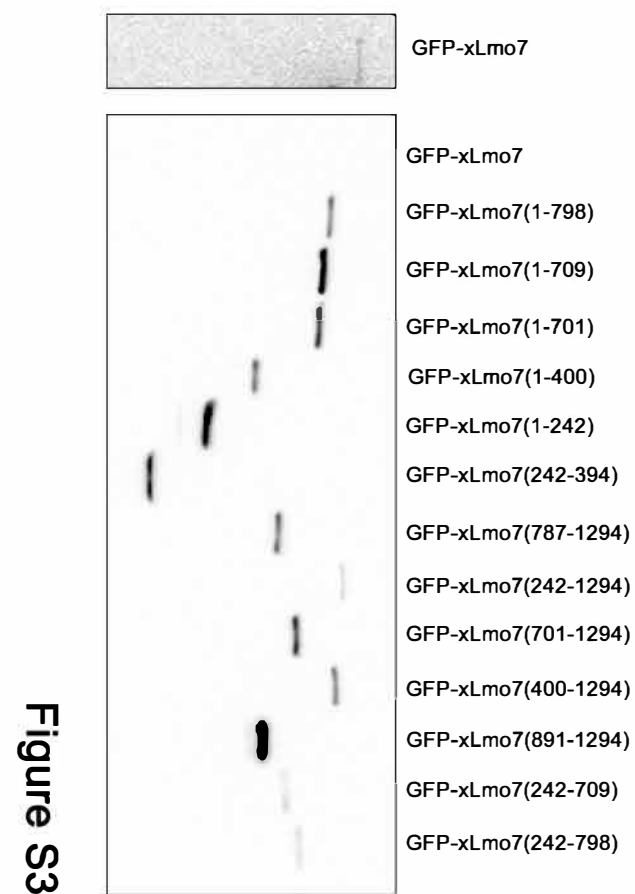

**Fig. S3. Expression levels of GFP-Lmo7 constructs in *Xenopus* embryos**

GFP-Lmo7 construct RNAs (1 ng) were injected into 4-8 cell stage embryos. Total embryo lysates were collected at stage 11. Expression levels of GFP-tagged Lmo7 constructs were assessed by immunoblotting with anti-GFP antibodies.

Long exposure of the sample from GFP-Lmo7-expressing embryos is shown on the left panel.

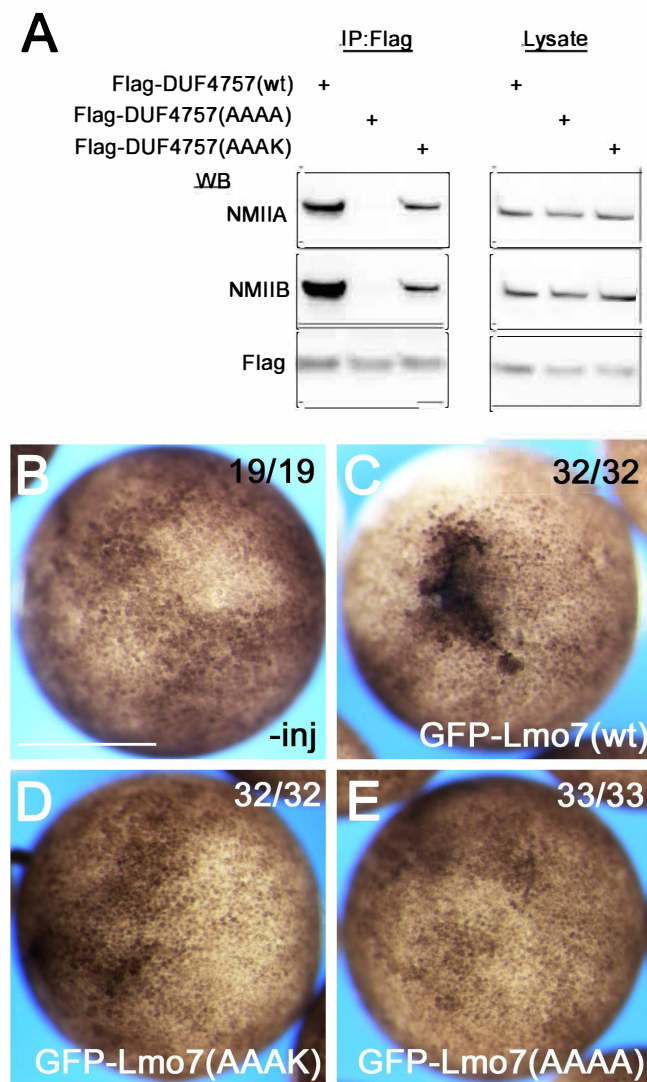

**Figure S4**

**Fig. S4. The DUF4757 domain binds NMII heavy chains and is required for Lmo7-mediated apical constriction**

(A) Flag-tagged DUF4757 (wt), DUF4757 (WQWK->AAAA), or DUF4757 (WQWK->AAAK) were transfected into HEK293T cells. Cell lysates were immunoprecipitated with anti-Flag antibody. Co-immunoprecipitation of endogenous NMIIA and NMIIB was examined by western blot. (B-E) Representative images of apical pigment granule accumulation in embryos expressing Lmo7 (wt), Lmo7(AAAK), and Lmo7(AAAA). Relevant RNA was injected into two blastomeres of 4-8 cell *Xenopus* embryos. Scale bar: 500  $\mu$ m in B.



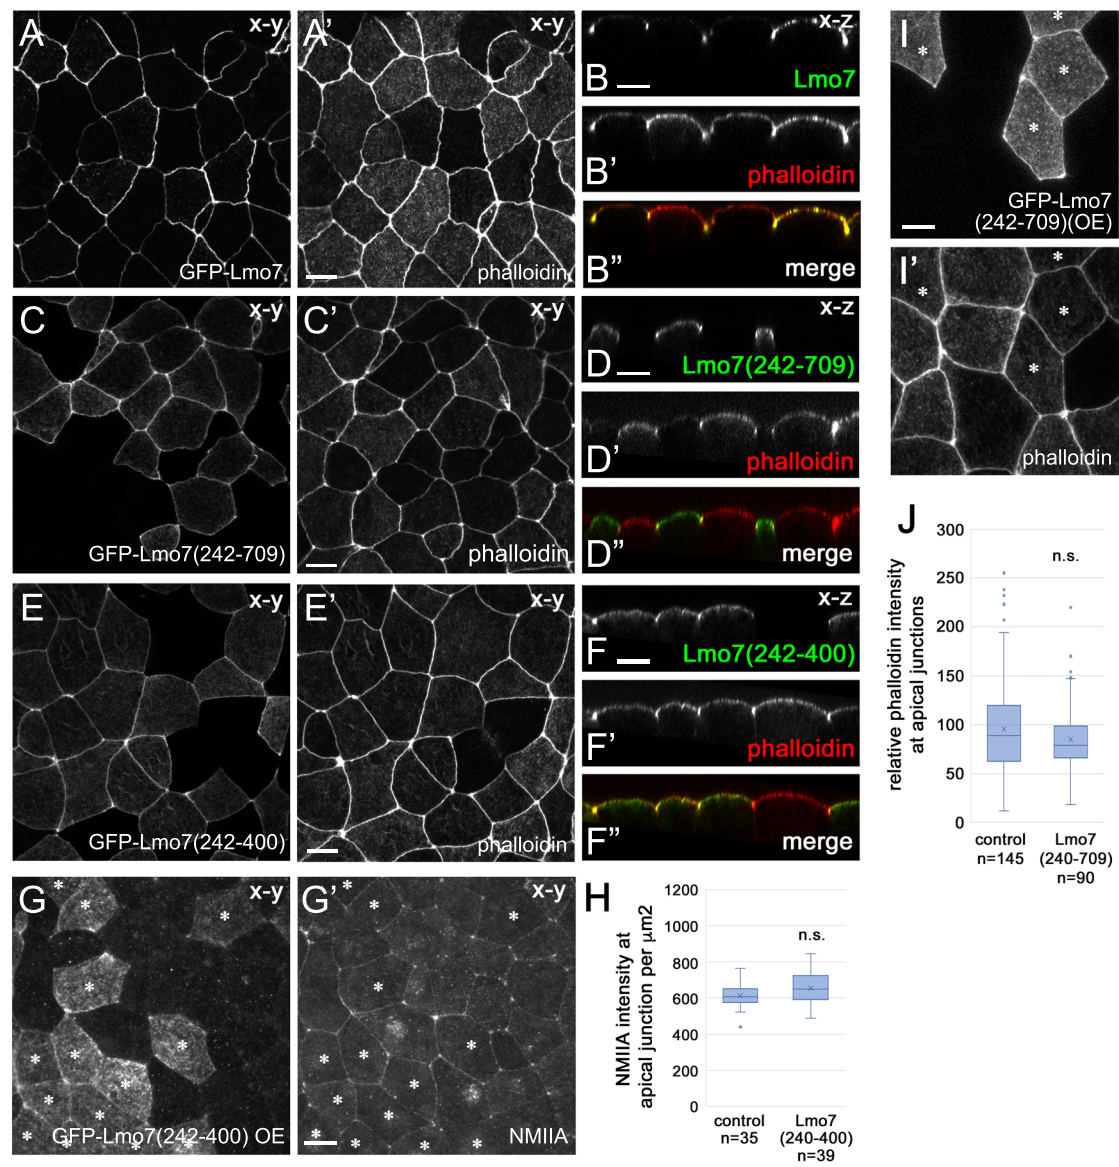

Figure S5

**Fig. S5. The subcellular localization and effects of GFP-Lmo7(aa 242-709) on F-actin**

RNAs were injected into 4-8 cell embryos. At stage 11, the embryos were fixed and the ectoderm was stained with phalloidin (A-F'', I-I'), or anti-GFP and NMIIA antibodies (G, G'). (A-F'') The subcellular localization of GFP-Lmo7 (A-B''), GFP-Lmo7(aa 242-709), and GFP-Lmo7(aa 242-400) after injection of 200 pg of each RNA. x-y view (A-A', C-C', E-E') and x-z view (B-B'', D-D'', F-F). Note that both Lmo7(aa 242-709)(C-D'') and Lmo7(aa 242-400) show more localization at the apical cortex, compared to full-length Lmo7. (G-H) The effects of GFP-Lmo7(aa 242-400)(1 ng RNA) on NMIIA in stage 11 ectoderm. (G-G') Ectodermal cells expressing GFP-Lmo7(aa 242-400)(asterisks). (H) Quantification of GFP-Lmo7(aa 242-400) effects on NMIIA at apical junctions. Fluorescent intensity of NMIIA was measured on individual cell-cell boundaries. (I-J) The effects of GFP-Lmo7(aa 242-709)(1 ng RNA) on F-actin in stage 11 ectoderm. (I, I') Ectodermal cells expressing GFP-Lmo7(aa 242-709)(asterisks). (J) Quantification of F-actin accumulation at apical junctions. Fluorescence intensity of phalloidin was measured at 3-10 locations within individual perijunctional F-actin bundles. Statistical significance of the difference between the median values was assessed by the Mann-Whitney U test. Data are representative of three independent experiments. Scale bar: 10  $\mu$ m.





**Fig. S6. *Lmo7* expression in *Xenopus* embryos**

(A) *Lmo7l* and *Lmo7s* expression was examined by RT-PCR. Both *Lmo7l* and *Lmo7s* are expressed maternally and zygotically throughout early embryonic development. (B-O) Expression of *Lmo7l* was examined by *in situ* hybridization. (B, D, F-N) *Lmo7l* antisense probes. (C, E, O) *Lmo7l* sense probes. Asterisks in B, C represent the blastopore. A: anterior. P: posterior. D: dorsal. V: ventral. nt: neural tube. pm: paraxial mesoderm. pe: preplacodal ectoderm. ht: heart. st: somites. pa: pharyngeal arches.

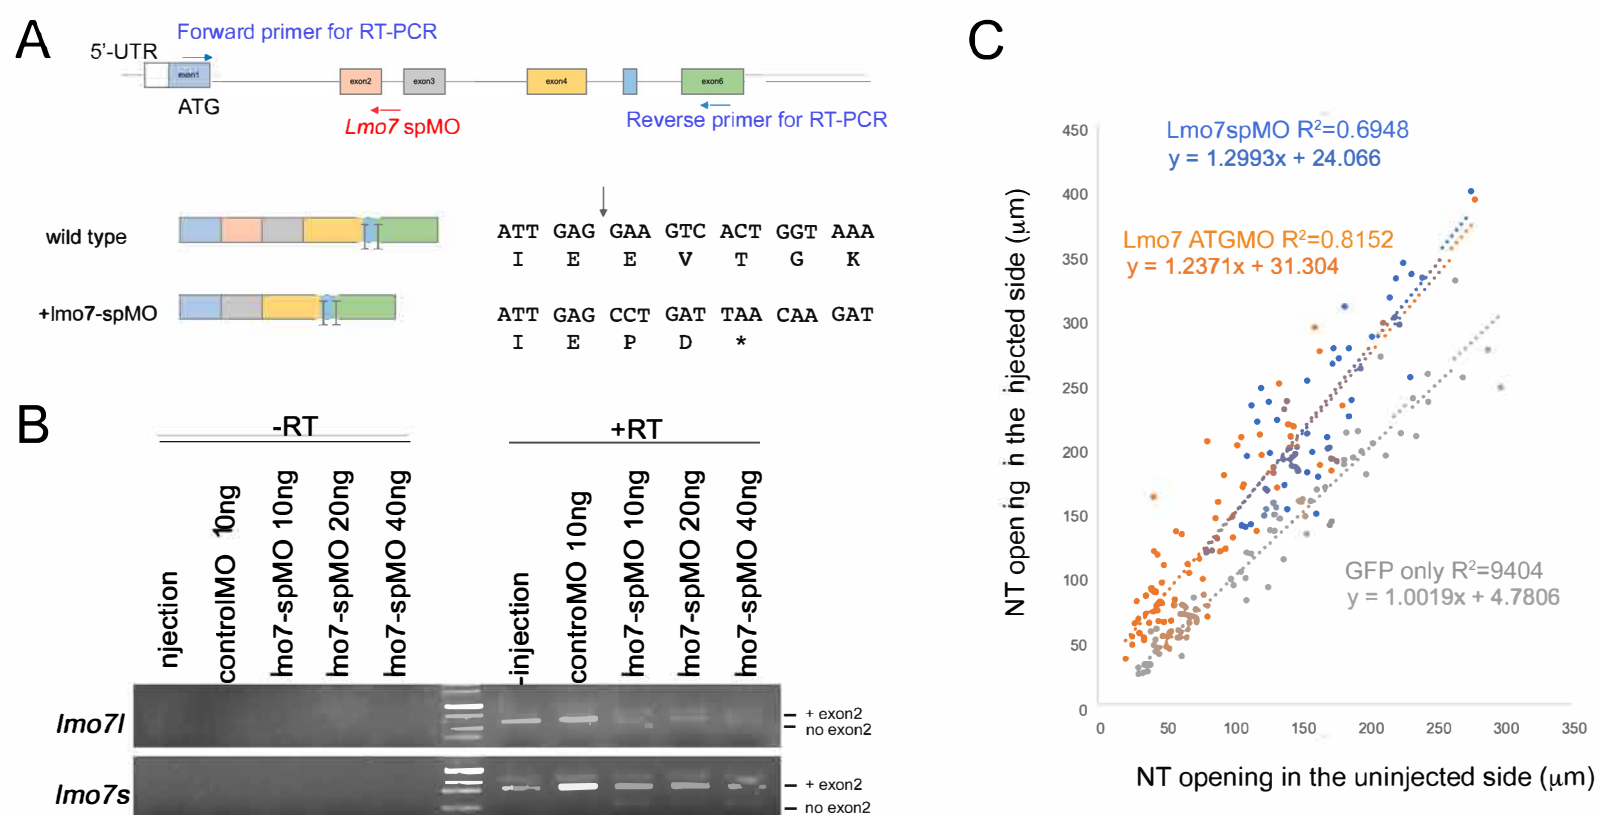

Figure S7

**Fig. S7. Lmo7 knockdown delays neural tube closure**

(A) Schematics of Lmo7 splicing blocking morpholino (Lmo7-spMO) design. Lmo7-spMO is designed to target the splicing donor site of exon 2. Lmo7-spMO sequence show 100 and 84% match to *Lmo7l* and *Lmo7s*, respectively. (B) RT-PCR results of *Lmo7l* and *Lmo7s* transcripts in *Lmo7-spMO* injected embryos. Note the appearance of lower bands. DNA sequencing of these bands confirmed the absence of the exon 2 and premature stop codon (shown in A). (C) Neural tube closure delay in Lmo7 knockdown embryos, related to Figure 9L. X-axis and Y-axis represent the widest distance from the midline to the edge of the neural fold in the control uninjected side and the injected side, respectively.

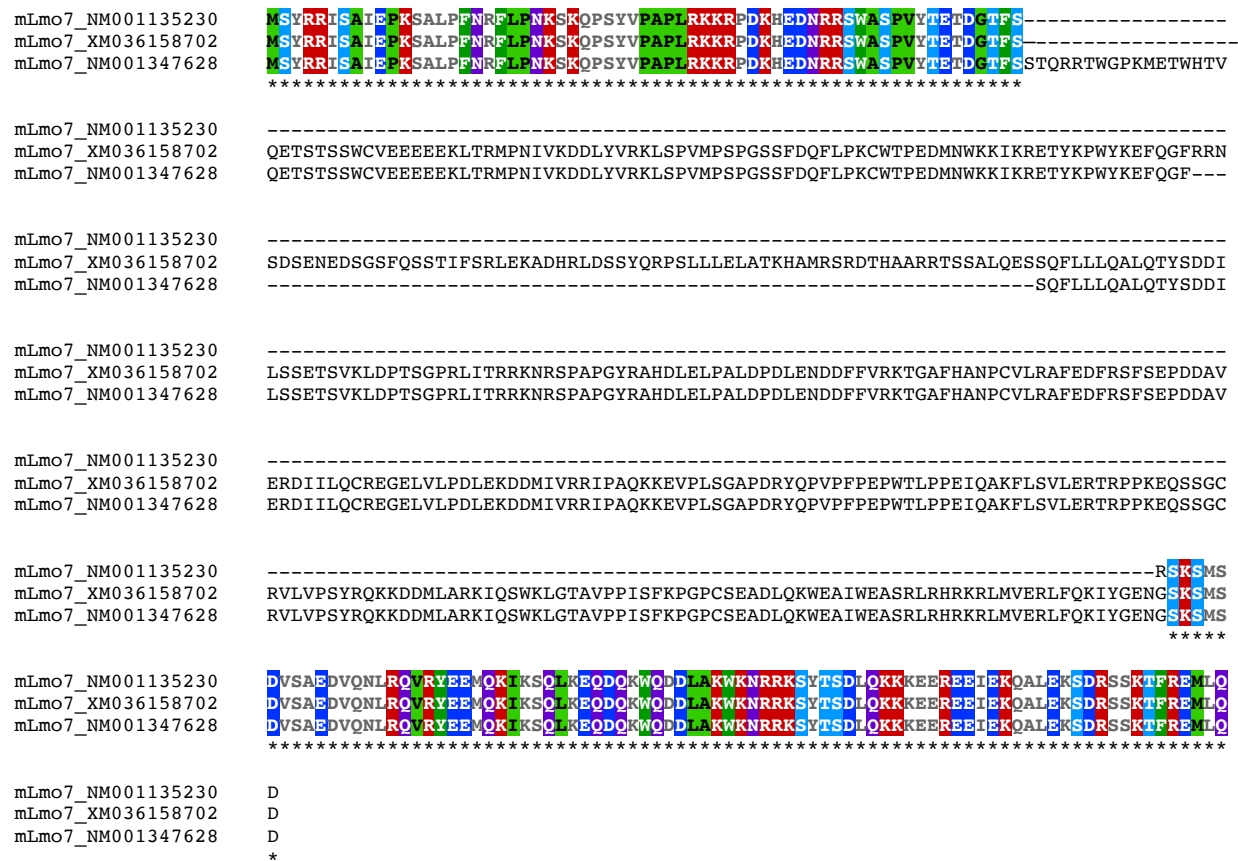

**Fig. S8. Sequence alignment of DUF4757/NMIIBD among mouse Lmo7 splice variants**

The DUF4757/NMIIBD were compared among three splice variants of *Mus musculus* Lmo7; NM\_001135230, XM\_036158702 and NM\_001347628. Evolutionally conserved positively charged, negatively charged, hydrophobic and hydrophilic amino acids are marked by red, blue, green and purple as shown in Figure 7B. Conserved Ser/Thr are marked by light blue.

**Table S1. Primer list**

|                       |                                                           |
|-----------------------|-----------------------------------------------------------|
| xLmo7-2F-EcoRI        | gaattcgggaatggaatgaaaattc                                 |
| xLmo7-242F-EcoRI      | gaattccatgtcccatcgtagg                                    |
| xLmo7-400F-EcoRI      | gaattcggagagggaaacccg                                     |
| xLmo7-700F-EcoRI      | gaattcgtacagtgcctgagaat                                   |
| xLmo7-787F-EcoRI      | gaattctggcaagaatgactgg                                    |
| xLmo7-898F-EcoRI      | gaattcttgggatccagaaga                                     |
| xLmo7-242R-stop-NheI  | gctagctcagtcattcttctgctg                                  |
| xLmo7-394R-stop-NheI  | gctagctcaggtttccctctctgt                                  |
| xLmo7-709R-stop-NheI  | gctagctcaaggtttctggtaatgc                                 |
| xLmo7-790R-stop-NheI  | gctagctcagtcattcttgccatc                                  |
| xLmo7-1028R-stop-NheI | gctagctcattttaaaacattattccttctg                           |
| xLmo7-1274R-stop-NheI | gctagctcacatggaggttg                                      |
| xLmo7-WQWK(AAAA)-F    | gagcaggatcagcagGCgGCgaatgatttagcaaaaGCgGCgaatcgtcgaaaaagc |
| xLmo7-WQWK(AAAA)-R    | gctttttcgcagattcGCcGCttttgctaaatcattcGCcGCctgctgatcctgctc |
| morpholino            |                                                           |
| xLmo7 ATGMO           | GAATTTTCATTCATTCATTG                                      |
| xLmo7 SpMO            | AAATGCAAAGAATGTACTTACTCGC                                 |

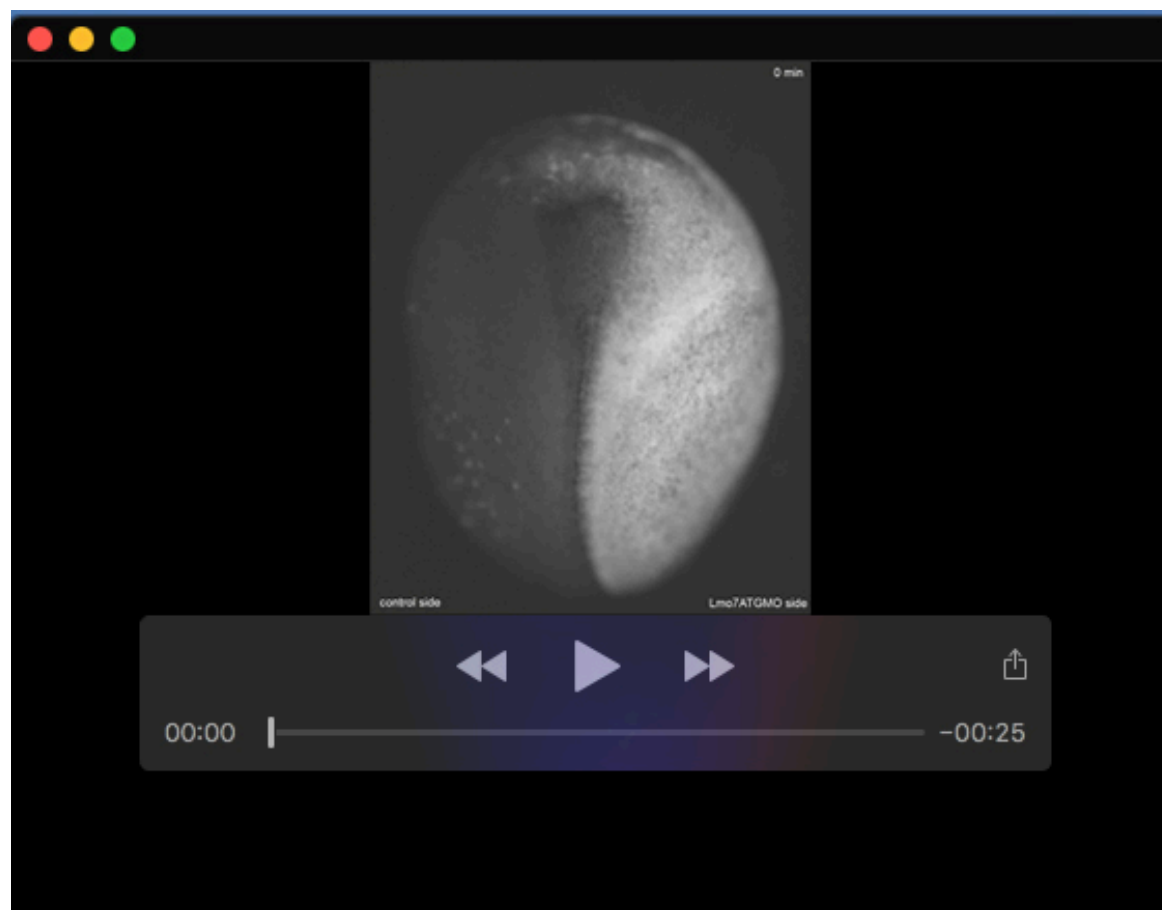**Movie 1. Lmo7 knockdown delays neural tube closure.**

Time-lapse recording of neural tube closure in embryos injected with Lmo7ATGMO only on the right side. GFP RNA is co-injected to trace the morpholino injected side. Dorsal view. Images were taken every 2 min. Duration of the time-lapse video is 176 min.
